# Supplementary material for: Lysine metabolism conveys kidney protection in hypertension
Source: Research Square preprint supplement (doi:10.21203/rs.3.rs-108965/v1), 2020-11-30
Supplement: Supplementary file 1 [file 8290f3b84cbe0997db333694.docx]

**Supplementary methods file.**

1. **Synthesis of analytical standards**

**General**

All reagents and solvents were purchased from commercial suppliers and used without further purification. NMR spectra were recorded on a Bruker AVIII (600 MHz) spectrometer at ambient temperature. Chemical shifts () of 1H NMR spectra are reported in ppm with the solvent resonance employed as internal standard (CHCl3 at 7.26 ppm). Peaks are reported as s = singlet, d = doublet, t = triplet, q = quartet, m = multiplet or unresolved, br = broad signal, coupling constant(s) in Hz (*J*), integration. 13C NMR spectra were recorded with 1H-decoupling and chemical shifts are reported in ppm with the solvent resonance employed as internal standard (CDCl3 at 77.16 ppm). Purification by mass directed preparative reversed phase HPLC was performed on a Waters Autopurification LC with a Waters BEH C18 column (5 um, 19x160 mm) using a 0.1% aqueous formic acid:acetonitrile gradient (30 mL/min, main segment of gradient at 5-20% acetonitrile over 8 minutes) at ambient temperature. Fractionation was triggered by a Waters QDa single quadrupole mass spec (ESI+).

**Synthesis of **-malonyl-*L*-lysine 1**

To a solution of Boc-Lys-OtBu∙HCl (51 mg, 0.15 mmol, 1.0 equiv) and malonic acid mono-tert-butyl ester (29 mg, 0.18 mmol, 1.2 equiv) in DMF (0.75 mL) was added HATU (39 mg, 0.17 mmol, 1.1 equiv), followed by triethylamine (65 L, 0.38 mmol, 2.5 equiv). The reaction was stirred at room temperature for 30 min, subsequently diluted with brine (15 mL) and extracted with EtOAc. The combined organic phase was washed with 5% aqueous LiCl solution, dried over Na2SO4 and concentrated under reduced pressure. The crude product was purified by flash column chromatography (hexanes/EtOAc 5:1 to 2:1) to afford **1a** (55 mg, 82%) as a colorless oil.

Analytical standard **1** for comparison with metabolite extracts from tissue was prepared by deprotection of **1a** (22.3 mg, 0.05 mmol, 1.0 equiv) using TFA/DCM (1:1, 1 mL) for 2 hours at room temperature. Volatiles were removed under reduced pressure and the crude product was purified by mass directed preparative reversed phase HPLC to give the formic acid salt of **1** (11 mg, 79%) after lyophilization which was directly used as an analytical standard after resuspension in acetonitril:water 1:1 and characterization by MS/MS.

*Analytical data of 1a*:**1H NMR** (600 MHz, CDCl3) δ = 7.24 (br, 1H), 5.06 (d, *J* = 8.4 Hz, 1H), 4.17 (q, *J* = 7.4, 7.0 Hz, 1H), 3.29 (td, *J* = 7.1, 5.6 Hz, 2H), 3.22 (s, 2H), 1.86 – 1.75 (m, 1H), 1.67 – 1.61 (m, 1H), 1.61 – 1.54 (m, 2H), 1.49 (s, 9H), 1.48 (s, 9H), 1.46 (s, 9H), 1.44 – 1.32 (m, 2H); **13C NMR** (151 MHz, CDCl3) δ = 172.0, 169.2, 165.6, 155.6, 82.6, 82.0, 79.8, 53.9, 42.1, 39.4, 32.8, 29.2, 28.5, 28.2, 28.1, 22.7; **HR-MS-ESI-TOF (*m/z*):** calculated [M+H]+ for C22H41N2O7:445.2908, measured 445.2908

**Synthesis of **-malonyl-*L*-lysine**

To a solution H-Lys(Boc)-OtBu∙HCl (51 mg, 0.15 mmol, 1.0 equiv) and malonic acid mono-tert-butyl ester (29 mg, 0.18 mmol, 1.2 equiv) in DMF (0.75 mL) was added HATU (39 mg, 0.17 mmol, 1.1 equiv), followed by triethylamine (65 L, 0.38 mmol, 2.5 equiv). The reaction was stirred at room temperature for 30 min, subsequently diluted with brine (15 mL) and extracted with EtOAc. The combined organic phase was washed with 5% aqueous LiCl solution, dried over Na2SO4 and concentrated under reduced pressure. The crude product was purified by flash column chromatography (hexanes/EtOAc 5:1 to 2:1) to afford **2a** (51 mg, 76%) as a colorless oil.

Analytical standard **2** for comparison with metabolite extracts from tissue (extracted in was prepared by deprotection of **2a** (22.3 mg, 0.05 mmol, 1.0 equiv) using TFA/DCM (1:1, 1 mL) for 2 hours at room temperature. Volatiles were removed under reduced pressure and the crude product was purified by mass directed preparative reversed phase HPLC to give the formic acid salt of **2** (10 mg, 72%) after lyophilization which was directly used as an analytical standard after resuspension in acetonitril:water 1:1 and characterization by MS/MS.

*Analytical data of 2a*: **1H NMR** (600 MHz, CDCl3) δ = 7.56 (d, *J* = 7.6 Hz, 1H), 4.56 (br, 1H), 4.50 (td, *J* = 7.4, 5.2 Hz, 1H), 3.24 (s, 2H), 3.10 (d, *J* = 6.7 Hz, 2H), 1.88 – 1.81 (m, 1H), 1.73 – 1.65 (m, 1H), 1.54 – 1.49 (m, 2H), 1.48 (s, 9H), 1.47 (s, 9H), 1.43 (s, 9H), 1.41 – 1.28 (m, 2H); **13C NMR** (151 MHz, CDCl3) δ = 171.3, 168.5, 165.3, 156.1, 82.7, 82.3, 79.2, 52.7, 42.5, 40.4, 32.4, 29.7, 28.6, 28.2, 28.1, 22.4; **HR-MS-ESI-TOF (*m/z*):** calculated [M+H]+ for C22H41N2O7:445.2908, measured 445.2915

****-malonyl-*L*-lysine 1a**

****-malonyl-*L*-lysine 2a**
